# Supplementary material
Source: HighWire-hosted journal article supplement (https://www.cmajopen.ca/highwire/filestream/81050/field_highwire_adjunct_files/0/open-2016-0103-1-at.pdf)
Supplement: open-2016-0103-1-at.pdf [file open-2016-0103-1-at.pdf]

**Appendix 1** (as supplied by the authors): Author placement by career path choice

|                                               | <b>PhD</b>                 |                  | <b>Masters</b>             |                  |
|-----------------------------------------------|----------------------------|------------------|----------------------------|------------------|
|                                               | <b>Physician-Scientist</b> | <b>Physician</b> | <b>Physician-Scientist</b> | <b>Physician</b> |
| <b>First-Author, median (IQR)</b>             | 7 (6.5)                    | 3 (2)            | 6 (5)                      | 1 (1)            |
| <b>Second-Author, median (IQR)</b>            | 4.5 (3.5)                  | 1 (2)            | 3 (5)                      | 0 (1)            |
| <b>Senior-Author, median (IQR)</b>            | 1.5 (9.5)                  | 0 (0)            | 1 (3)                      | 0 (0)            |
| <b>Other-Author, median (IQR)<sup>a</sup></b> | 9 (12)                     | 1.5 (4)          | 5 (7)                      | 0 (1)            |

<sup>a</sup> Level of authorship that was not first-, second-, or senior-author
